# Supplementary material for: Loss of Multimerin-2 and EMILIN-2 Expression in Gastric Cancer Associate with Altered Angiogenesis
Source: MDPI journal article supplement (doi:10.3390/ijms19123983), 2018-12-11
Supplement: s1 [file s1]

## Supplementary Figure S1

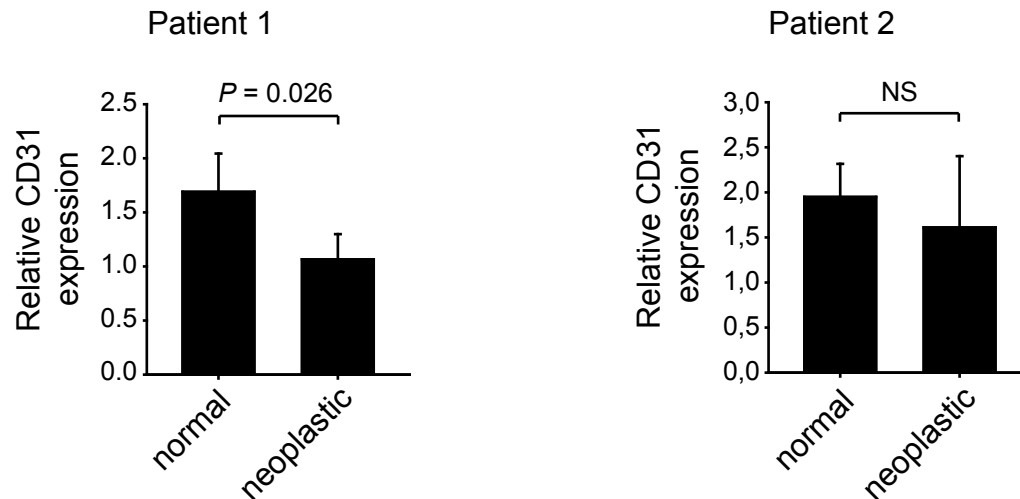

**Figure S1:** Graphs reporting the analysis of CD31 staining in normal and gastric cancer biopsies from patient 1 and 2, as indicated. Values represent the mean  $\pm$  SD; P values were obtained using the paired Student's t-test.
