# Supplementary material for: Loss of Multimerin-2 and EMILIN-2 Expression in Gastric Cancer Associate with Altered Angiogenesis
Source: MDPI journal article supplement (doi:10.3390/ijms19123983), 2018-12-11
Supplement: s1 [file s1]

Supplemental Video S1 showing the vasculature of a gastric cancer patient characterized by an angiogenic score 3 according to the Cannizzaro/Spessotto scale as detected by pCLE. Defective flow is clearly visible.
